# Supplementary material for: C3 Hypocomplementemia Predicts the Progression of CKD towards End-Stage Kidney Disease in IgA Nephropathy, Irrespective of Histological Evidence of Thrombotic Microangiopathy
Source: MDPI journal article supplement (doi:10.3390/jcm13092594), 2024-04-28
Supplement: s1 [file s1]

**Table S1.**Crude and multivariable adjusted HR associated with C3 to C4 ratio from Cox PH regression models

|                                             | C3/C4-Crude | C3/C4-Adj.  | C3/C4-Adj.+RAASi | C3/C4+TMA   | C3/C4+TMA-Adj. | C3/C4+TMA<br>Adj.+RAASi |
|---------------------------------------------|-------------|-------------|------------------|-------------|----------------|-------------------------|
| Point estimate                              | 0.89***     | 0.91*       | 0.92             | 0.90**      | 0.92           | 0.92                    |
| [Lower bound of<br>CI,Upper bound of<br>CI] | [0.82,0.97] | [0.82,1.00] | [0.83,1.02]      | [0.82,0.98] | [0.83,1.02]    | [0.83,1.03]             |
| p-value                                     | 0.009       | 0.051       | 0.103            | 0.018       | 0.108          | 0.153                   |

Comparison of crude and multivariable adjusted hazard ratios of ESKD associated with C3/C4 ratio from Cox proportional hazard regression models

The table reports the hazard ratio of ESKD [95 percent confidence interval] and P value for each model; asterisks refer to the level of P value to ease the readability of the table as follows: <0.01 \*\*\*, <0.05 \*\*, 0.1 \*. ESKD, end stage kidney disease; RAASi, renin angiotensin aldosterone inhibitors ; TMA, thrombotic microangiopathy.

LowC3-Crude, model including Low C3 only; TMA-Crude, model including TMA only; LowC3-Adj, model for Low C3 adjusted for age, ethnicity and gender; TMA-Adj, model for TMA adjusted for age, ethnicity and gender; LowC3-Adj.+RAASi, model including Low C3 additionally adjusted for RAASi; TMA-Adj.+RAASi, model including TMA additionally adjusted for RAASi; LowC3+TMA, model including both Low C3 and TMA; LowC3+TMA-Adj., model including both Low C3 and TMA adjusted for age, ethnicity and gender; LowC3+TMA Adj.+RAASi, model including both Low C3 and TMA, additionally adjusted for RASSi.

**Table S2.** Statistical tests that C3/C4 ratio is better than C3 alone to predict end stage kidney disease

|                                                              |
|--------------------------------------------------------------|
| C3/C4-Crude: Test that C3/C4 better than C3: P=0.079         |
| C3/C4-Adj: Test that C3/C4 better than C3: P=0.215           |
| C3/C4-Adj.+RAASi: Test that C3/C4 better than C3: P=0.279    |
| C3/C4+TMA: Test that C3/C4 better than C3: P=0.096           |
| C3/C4+TMA-Adj.: Test that C3/C4 better than C3: P=0.281      |
| C3/C4+TMA Adj.+RAASi:Test that C3/C4 better than C3: P=0.317 |
